# Supplementary material for: Prostaglandin E2 regulates senescence and post-senescence neoplastic escape in primary human keratinocytes
Source: Aging (Albany NY). 2024 Nov 18;16(21):13201–24. doi: 10.18632/aging.206149 (PMC11719115; doi:10.18632/aging.206149)
Supplement: Supplementary Figures [file aging-16-206149-s001.pdf]

SUPPLEMENTARY FIGURES

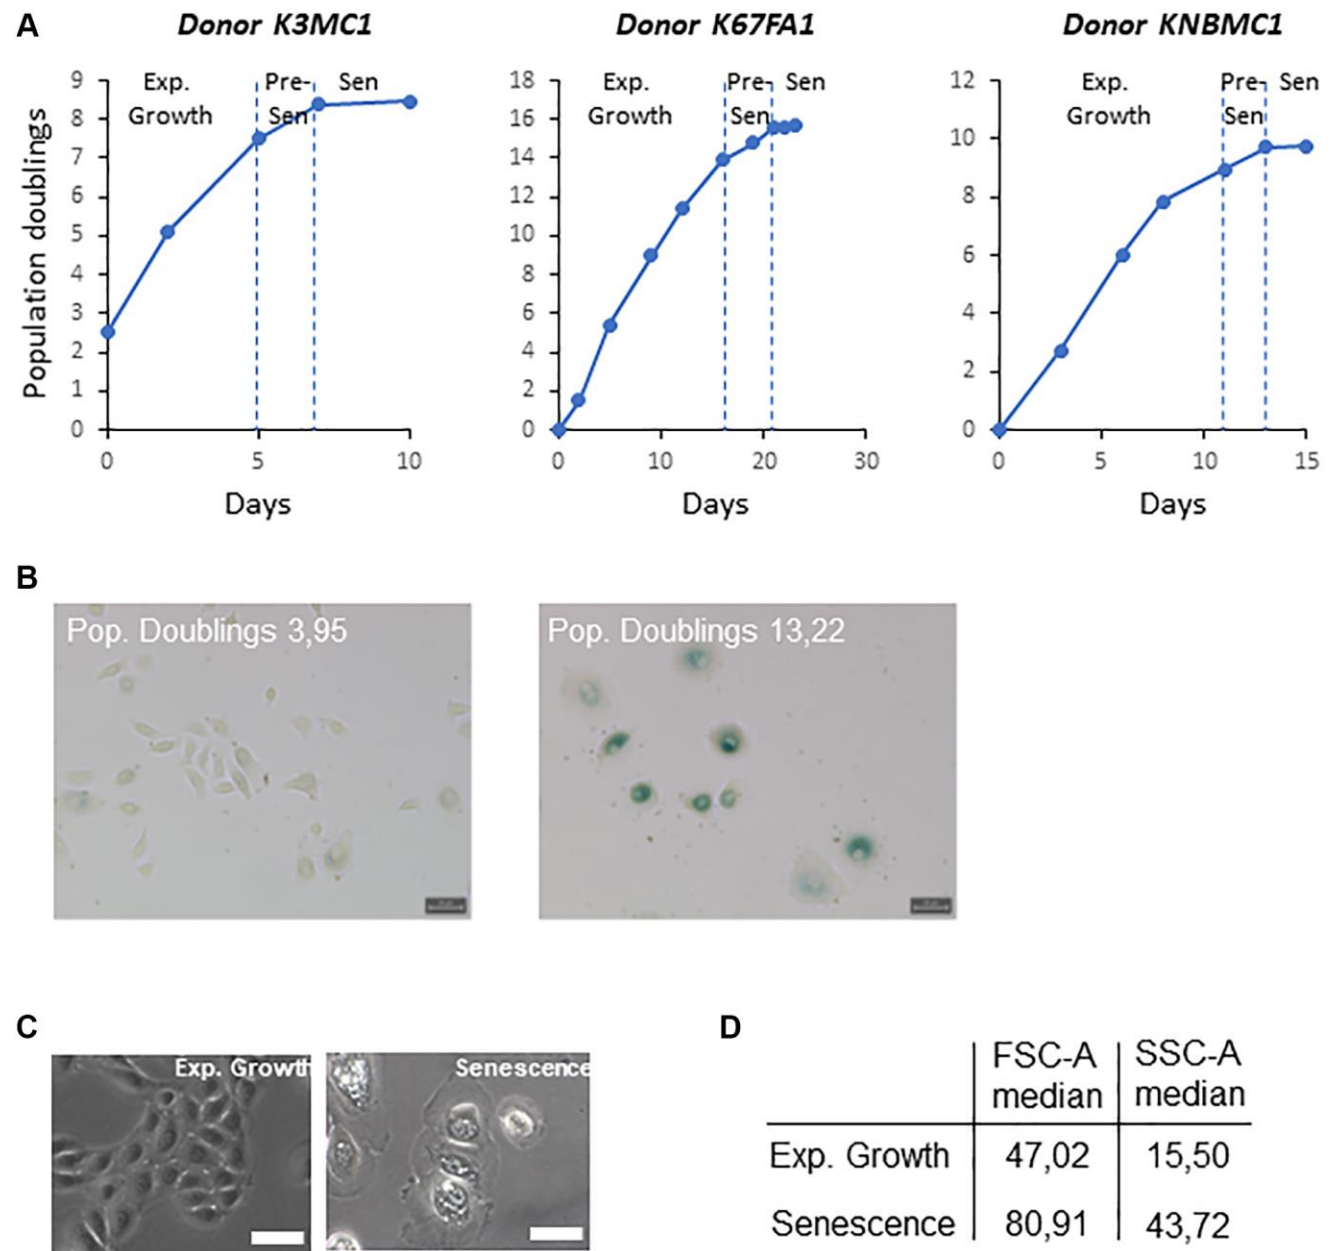

**Supplementary Figure 1. Growth curve and senescence characteristics of *in vitro* cultured NHEKs.** (A) Examples of growth curves of NHEKs (various donors) showing the exponential growth phase, the pre-senescent phase, and the senescence plateau. (B) Representative microscopy images of SA- $\beta$ -Gal staining in exponentially growing and senescent NHEKs (Donor K40FH1). Bar represents 50  $\mu$ m. (C) Cell morphologies observed by phase-contrast microscopy. The images shown illustrate the differences between proliferating and senescent NHEKs, recognizable by their large size and the presence of numerous cytoplasmic refringent or dark vesicles or particles. Bar represents 100  $\mu$ m. (D) Flow cytometric data of NHEKs (K40FH1) at the senescence plateau of forward scatter factor (FSC-A) and side scatter factor (SSC-A).

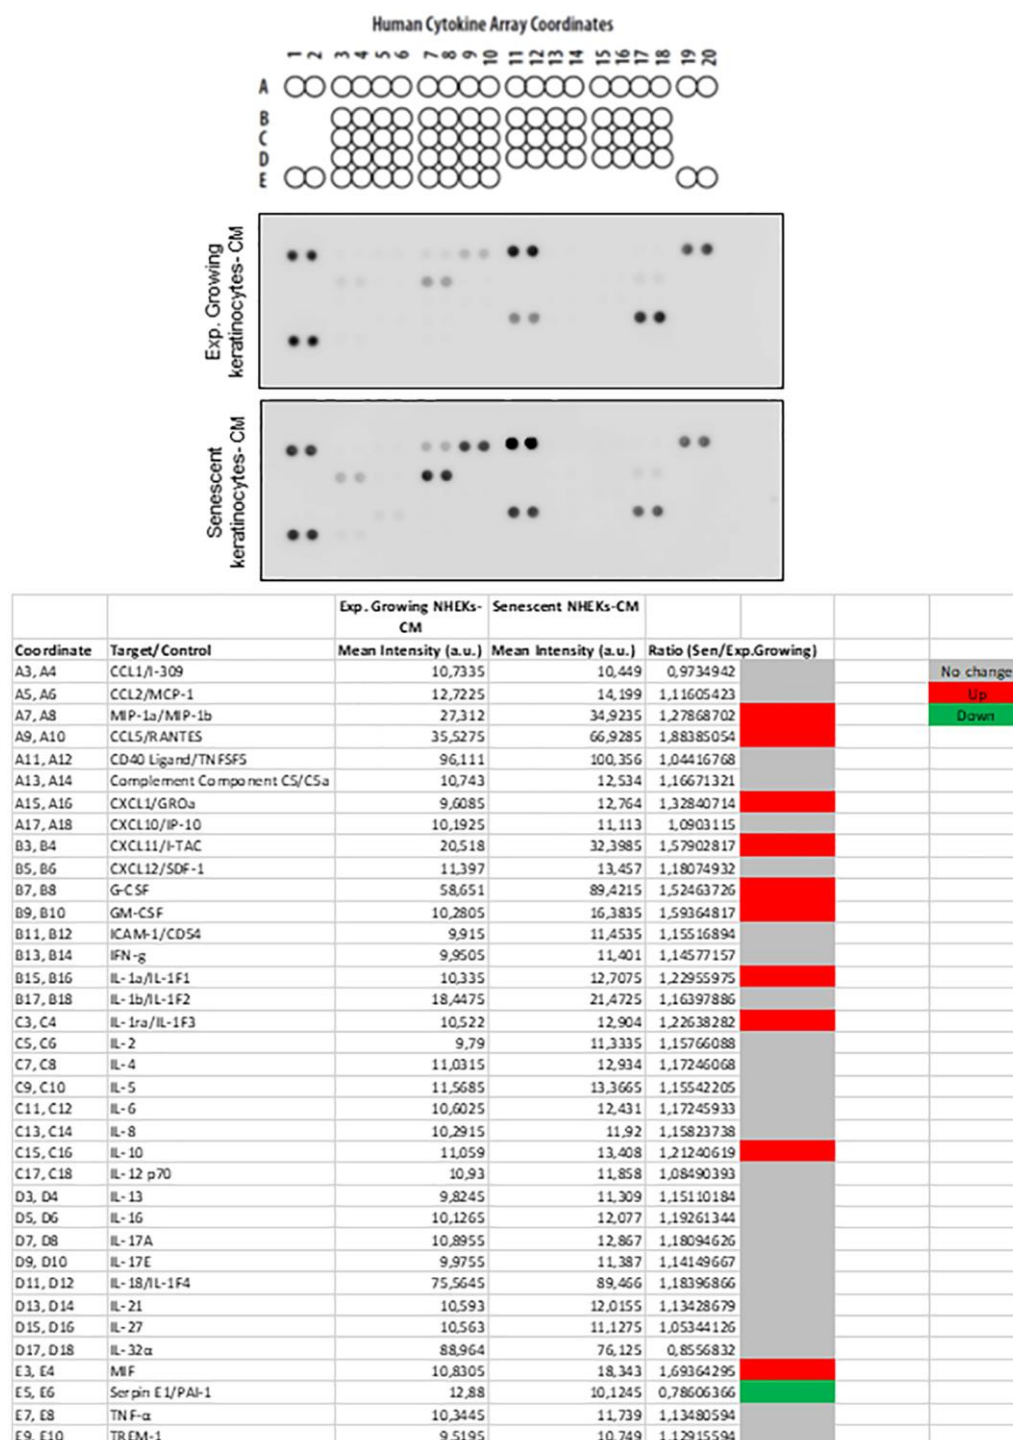

**Supplementary Figure 2. SASP composition in NHEKs.** Cytokine/chemokine array performed with conditioned medium from senescent and exponentially growing NHEKs. The intensity of the signals was quantified by densitometry (ImageJ) and normalized to positive controls for each sample.

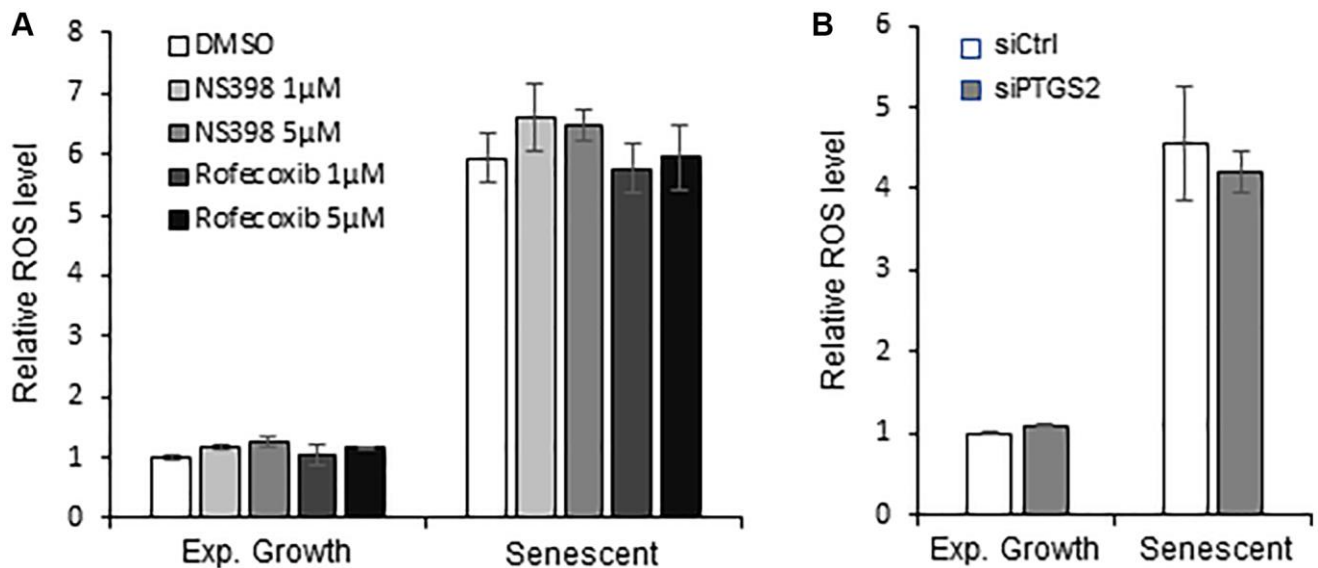

**Supplementary Figure 3: Contribution of ROS-generating activity of PTGS2 to the senescent phenotype in NHEKs.** (A) NHEKs (donor K23FC1) at the exponential growing phase or at the senescence plateau were treated or not with NS398 or rofecoxib for 16 hrs. ROS levels were analyzed by using the H<sub>2</sub>DCFDA probe. The fluorescence was normalized to cell numbers and was expressed as relative values, a value of 1 corresponding to the level of fluorescence in exponentially growing cells. (B) Senescent NHEKs (donor K23FC1) were transfected with a pool of 4 siRNAs targeting PTGS2, or with non-target siRNAs. ROS levels were measured and analyzed as in (A). In A and B, the measures were performed in triplicate. The bars represent the mean + SD.

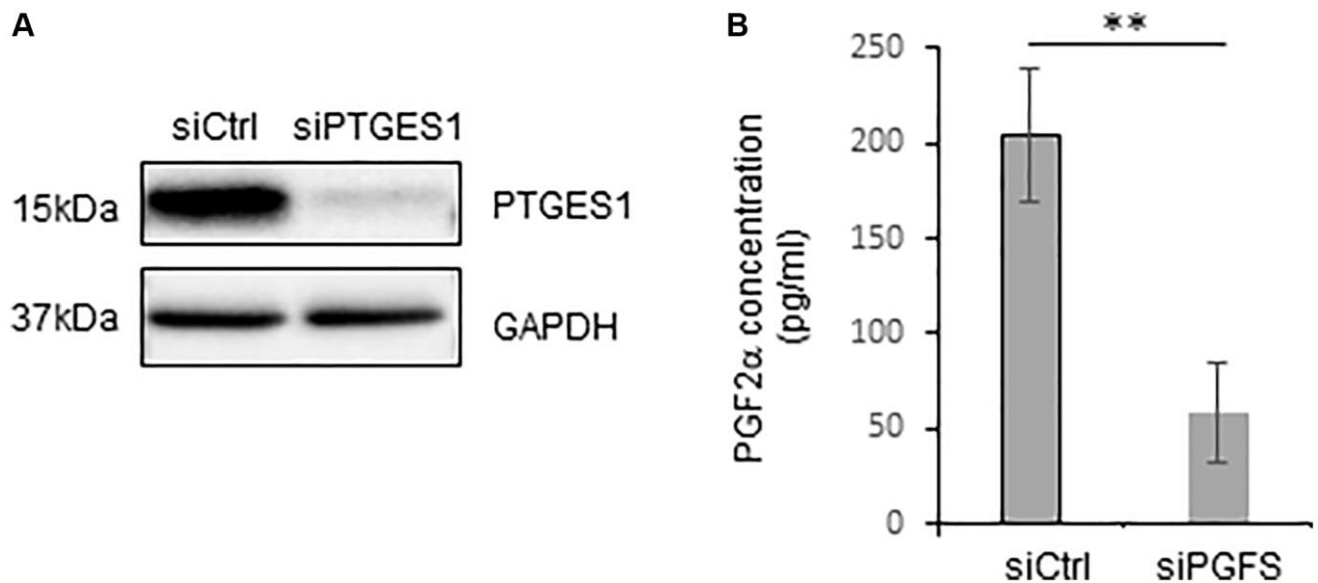

**Supplementary Figure 4. Evaluation of PTGES1 and PGFS silencing efficiency.** (A) Analysis of PTGES1 protein levels in senescent NHEKs (Donor K40FH1) subjected to PTGES1 silencing compared to a non-target siRNA as control 96h after transfection. GAPDH was used as loading control. (B) Analysis of the amount of PGF2α, by competitive assay in senescent NHEKs (Donor K40FH1) subjected to PGFS silencing compared to a non-target siRNA as control 96 h after transfection. The results were normalized to the number of senescent NHEKs. Bars represent the mean ± SD of three independent experiments.

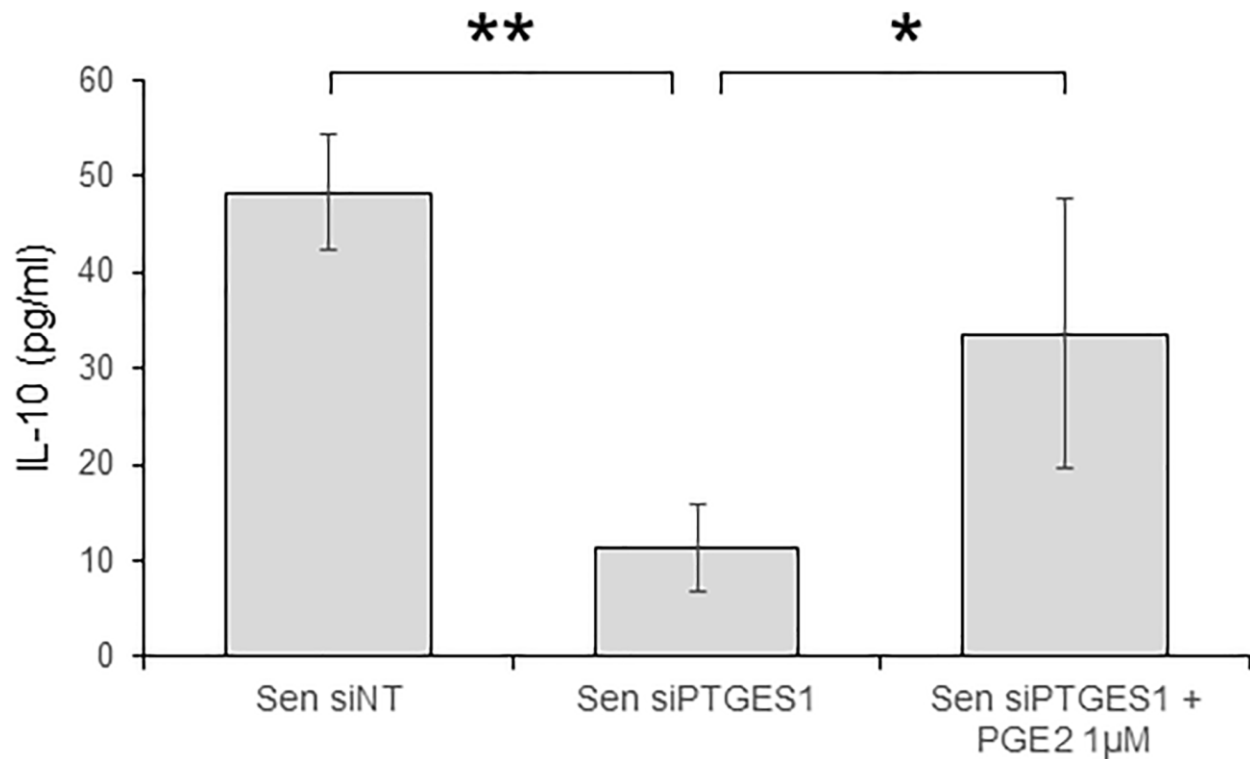

**Supplementary Figure 5. PTGES1 controls the secretion of IL-10 through the production of PGE<sub>2</sub>.** Senescent NHEKs (Donor K40FH1) were transfected with a pool of 4 siRNAs targeting PTGES1, or with non-target siRNAs (siCtrl). Two days after transfection, NHEKs were treated or not with 1 µM PGE<sub>2</sub> 4-times a day during 3 days. The amounts of IL-10 in the conditioned media (secreted) were measured by an ELISA assay. Measures were performed in triplicate. Bars represent the mean  $\pm$  SD. Significant differences are indicated with asterisks with \* $p$  < 0.05 and \*\* $p$  < 0.01.

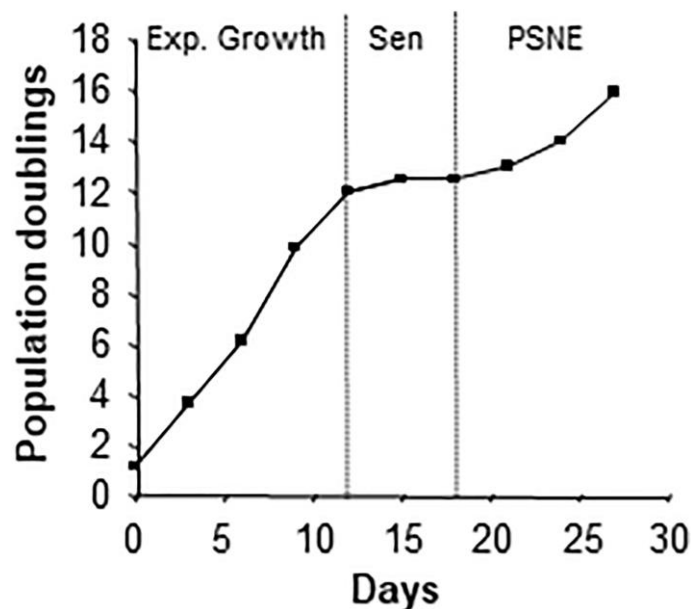

**Supplementary Figure 6. Outcome of NHEKs.** NHEK growth curve (from donor 4F0315) showing the exponentially growing, senescent and emergent (PSNE) phases.
