# Supplementary material for: Prostaglandin E2 regulates senescence and post-senescence neoplastic escape in primary human keratinocytes
Source: publisher site journal article supplement (doi:10.18632/aging.206149), 2024-11-18
Supplement: Supplementary file [file aging-v16i21-206149-supplementary-material-SD2.pdf]

## SUPPLEMENTARY TABLE

Supplementary Table 1. Characteristics of donors of skin samples.

|       | <b>N° = Patient</b> | <b>Age</b> | <b>Fitzpatrick type</b> | <b>Localization</b>     | <b>Smoking</b> |
|-------|---------------------|------------|-------------------------|-------------------------|----------------|
| Young | 1                   | 39         | 3                       | Right arm               | no             |
|       | 29                  | 20         | 2                       | Right thigh             | no             |
|       | 46                  | 19         | 3                       | Left hip                | no             |
|       | 58                  | 39         | 3                       | Right thigh             | yes            |
|       | 4                   | 70         | 2                       | Right thigh             | yes            |
| Aged  | 5                   | 82         | 1                       | Left inner thigh        | no             |
|       | 9                   | 87         | 3                       | Posterior right thigh   | no             |
|       | 55                  | 63         | 3                       | Inner side of left knee | no             |
|       | 56                  | 79         | 5                       | Right buttock           | no             |
